# Supplementary material
Source: publisher site journal article supplement (http://kjim.org/upload/media/kjim-2020-142-suppl2.pdf)
Supplement: Supplementary file 1 [file kjim-2020-142-suppl2.pdf]

**Supplementary Table 2. ICD-9-CM codes used for acute medical conditions associated with critically ill status**

| Disease                                                  | ICD-9 codes                                           |
|----------------------------------------------------------|-------------------------------------------------------|
| Pneumonia                                                | 480-487, 507.0                                        |
| COPD exacerbation                                        | 491.1, 491.2                                          |
| Asthma exacerbation                                      | 493.X1, 493.X2                                        |
| Cardiac arrest/Ventricular fibrillation or flutter       | 427.41, 427.43, 427.5                                 |
| Acute coronary syndrome                                  | 410.X0, 410.X1                                        |
| Acute congestive heart failure                           | 276.6, 428.21, 482.23, 428.31, 428.33, 428.41, 428.43 |
| Stroke, intracranial hemorrhage, subarachnoid hemorrhage | 433.X1, 432.9, 430                                    |
| Severe sepsis                                            | 038, 020.0, 790.7, 117.9, 112.5, 112.81               |

ICD-9-CM, International Classification of Diseases, Ninth Revision, Clinical Modification; COPD, chronic obstructive pulmonary disease.
